# Supplementary material for: Accessible in Theory, Inaccessible in Practice: A User-Centered Evaluation of Disability Inclusion in Humanitarian WASH Facilities in Gaza Displacement Camps
Source: Research Square preprint supplement (doi:10.21203/rs.3.rs-8539145/v1), 2026-01-16
Supplement: Supplementary file 1 [file a7645ecac86a6a3574d7009a.docx]

**Supplementary File 1**

**Semi-Structured Interview Guide (English Version)**

**Study Title:**

*Accessible in Theory, Inaccessible in Practice: A User-Centered Evaluation of Disability Inclusion in Humanitarian WASH Facilities in Gaza Displacement Camps*

**Prepared by:**

Samer Abuzerr, PhD

Assistant Professor of Public Health

University College of Science and Technology – Khan Younis

**Date of Data Collection:** 23 September - 26 December 2025

**Data Collection Tools**

**1. Structured WASH Accessibility Audit Tool**

**Purpose:**
The structured WASH accessibility audit tool was designed to systematically assess the objective physical accessibility and functional usability of communal WASH facilities for persons with disabilities, in line with international humanitarian and disability-inclusive WASH standards.

**Content and Domains:**

The tool consisted of standardized, itemized checklists organized by facility type:

**A. Sanitation Facilities (Latrines):**

- **Approach and access:** Pathway width, slope, surface condition, presence of obstructions
- **Ramps and steps:** Presence, gradient, width, surface stability, handrails
- **Entrance:** Door width, threshold height, ease of opening/closing
- **Internal space:** Turning radius for wheelchairs, space for caregiver-assisted use
- **Fixtures:** Toilet seat height, availability and positioning of grab bars
- **Flooring and drainage:** Slip resistance, pooling water, cleanliness

**B. Bathing and Personal Hygiene Facilities:**

- **Privacy and enclosure:** Doors, locks, visual shielding
- **Internal layout:** Space for transfers and assisted bathing
- **Safety features:** Non-slip floors, handrails, grab bars
- **Environmental conditions:** Drainage, lighting, ventilation, cleanliness
- **Hygiene materials:** Accessibility of soap, water, and bathing aids

**C. Water Collection Points:**

- **Tap accessibility:** Height, reachability, ease of operation
- **Proximity:** Distance from shelters and accessibility of pathways
- **Ground conditions:** Stability, drainage, absence of mud or rubble
- **Usability:** Space for queuing, container placement, maneuvering

**Scoring System:**

Each item was scored as:

- **2 = Compliant**
- **1 = Partially compliant**
- **0 = Non-compliant**

Scores were aggregated into **composite accessibility scores (0–100)** per facility. Enumerators documented **photographs, notes, and GPS coordinates** for validation and quality control.

**2. Structured Observations Tool**

**Purpose:**
The structured observations tool captured real-time use, effort, safety, and dependence during WASH-related activities, allowing assessment of functional accessibility beyond infrastructure design.

**Content and Domains:**

Observations focused on routine activities performed by persons with disabilities, including sanitation use, bathing, and water collection.

Key variables included:

- **Time and distance:**
  - Time to reach facilities
  - Time required to complete WASH activities
- **Physical effort:**
  - Visible strain, fatigue, balance difficulties
  - Use or misuse of assistive devices
- **Assistance and dependence:**
  - Presence of caregiver assistance
  - Type of assistance (lifting, guiding, cleaning)
- **Safety risks:**
  - Slips, falls, near-falls
  - Environmental hazards
- **Behavioral adaptations:**
  - Delays, avoidance, or alternative practices

Observations were conducted discreetly to minimize disruption, with standardized recording forms ensuring consistency across sites.

**3. User-Centered Qualitative Evaluation (In-Depth Interviews)**

**Purpose:**
The qualitative evaluation explored lived experiences, perceptions of dignity, autonomy, and psychosocial impacts of WASH access among persons with disabilities and caregivers.

**Content and Domains:**

Semi-structured interviews included open-ended questions covering:

- **Perceptions of accessibility:**
  - Understanding and awareness of “accessible” facilities
  - Differences between perceived and actual usability
- **Barriers to use:**
  - Physical, environmental, and operational challenges
- **Dignity and privacy:**
  - Experiences of exposure, embarrassment, or loss of autonomy
- **Safety and fear:**
  - Past injuries, fear of falls, anxiety during use
- **Gender and age considerations:**
  - Menstrual hygiene, caregiving burdens, child-specific challenges
- **Coping strategies:**
  - Avoidance, delayed use, improvised solutions

Interviews were conducted in Arabic, audio-recorded with consent, transcribed verbatim, and anonymized.

**4. Participatory Evaluation Workshops**

**Purpose:**
Participatory workshops were conducted to center user voices in identifying priority barriers, evaluating existing solutions, and proposing feasible adaptations.

**Content and Methods:**

Workshops used inclusive, low-literacy methods suitable for humanitarian contexts, including:

- **Barrier mapping:**

Participants identified and visually mapped points of exclusion along sanitation, bathing, and water collection journeys.

- **Priority ranking:**

Barriers were ranked by severity and frequency using group consensus techniques.

- **Solution co-design:**

Participants proposed practical adaptations, focusing on low-cost, locally feasible modifications.

- **Policy-practice reflection:**
- Discussions explored gaps between humanitarian inclusion policies and lived experiences.

Workshops were facilitated by trained moderators and adapted for participants with sensory or intellectual disabilities through simplified language, visual aids, and caregiver support.
